# Supplementary material
Source: publisher figshare collection journal article supplement (https://tandf.figshare.com/ndownloader/files/15522164)
Supplement: Supplementary file 1 [file 15522164]

Appendix C: The average (black line) ± standard deviation (grey dotted line) transmissibility, phase and coherence of 21 participants for 24 anatomical locations in the backward lean position.

Appendix C: The average (black line) ± standard deviation (grey dotted line) transmissibility, phase and coherence of 21 participants for 24 anatomical locations in the backward lean position.

Appendix C: The average (black line) ± standard deviation (grey dotted line) transmissibility, phase and coherence of 21 participants for 24 anatomical locations in the backward lean position.

Appendix C: The average (black line) ± standard deviation (grey dotted line) transmissibility, phase and coherence of 21 participants for 24 anatomical locations in the backward lean position.
